# Supplementary material
Source: Springer Nature journal article supplement (https://www.springermedizin.de/resource/supplementary/12936_2011_1798_MOESM4_ESM.pdf/9541804)

EPG response (mV)

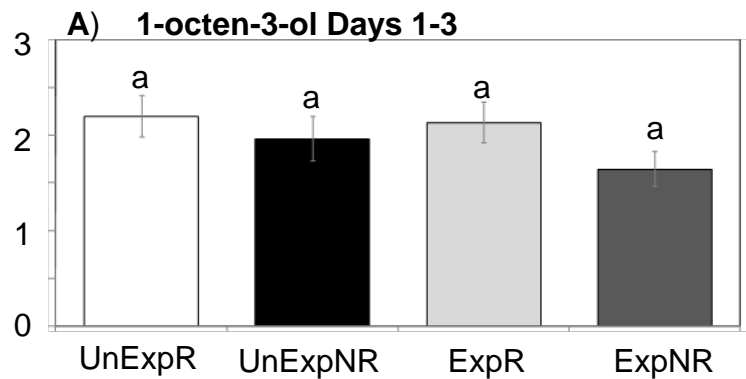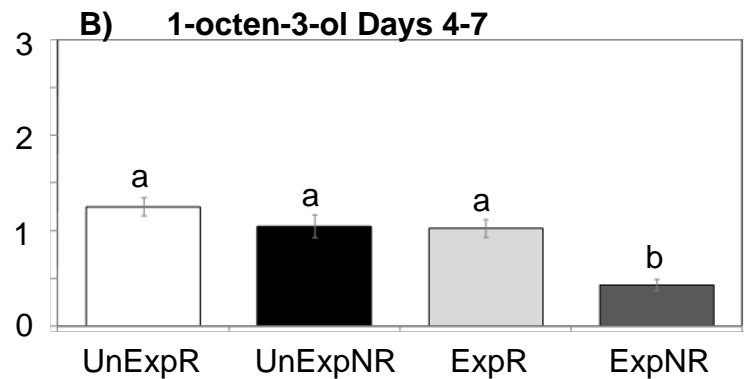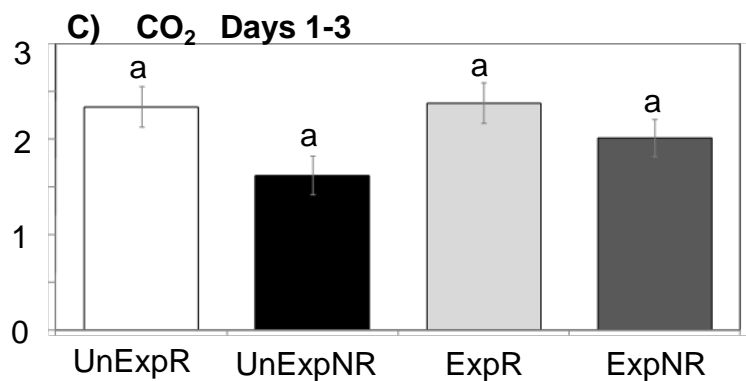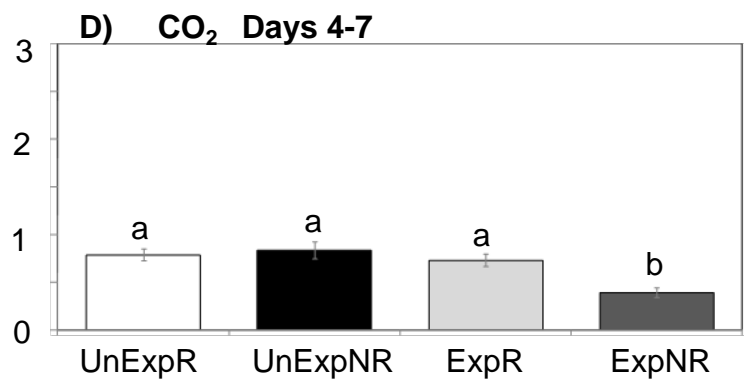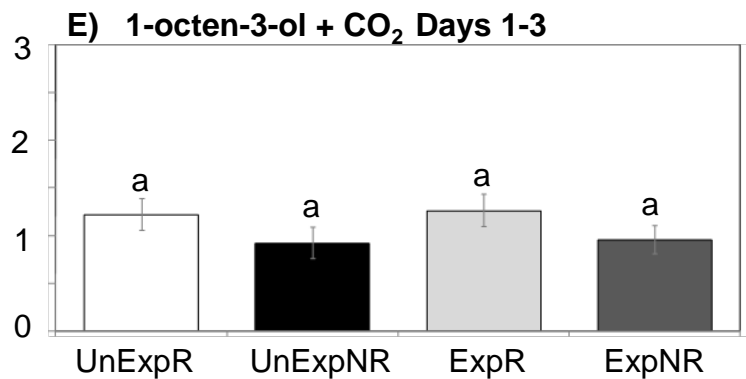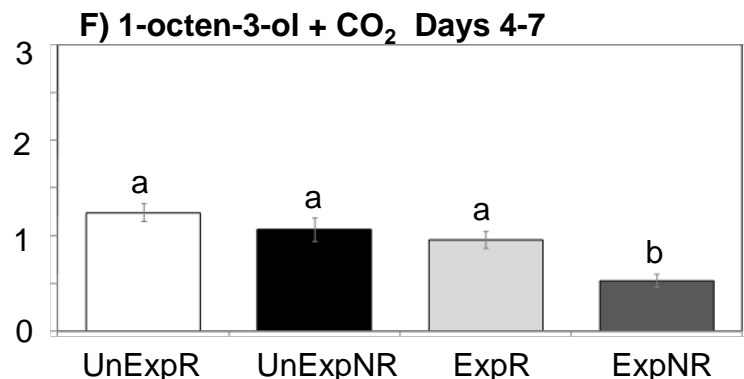

Treatment

Supplement: MOESM4 [file 9541804]
